# Supplementary material for: A clinical prediction model for the selection of cage height in oblique lumbar interbody fusion
Source: Research Square preprint supplement (doi:10.21203/rs.3.rs-8516900/v1), 2026-02-09
Supplement: Supplementary file 1 [file 6dad339c081e3b136b5de4b7.docx]

**Supplementary Table1.** Clinical and radiographic outcomes

|  | | **Pre-** | **1 week  post-** | **3 mo  post-** | **12 /6 mo post-** |
| --- | --- | --- | --- | --- | --- |
|  |
| Retrospective cohort (n=284) | Low back VAS | 6.75±0.88 | 3.35±1.09* | 2.36±0.82**#* | 1.92±0.76*#& |  |
| Leg VAS | 6.40±1.12 | 2.89±0.86* | 2.14+0.85*# | 1.43±0.78*#& |  |
| ODI | 36.76±4.71 | - | 16.27±4.68*# | 11.34±3.67*#& |  |
| MIVH (mm) | 9.48±1.76 | 12.53±1.53* | - | 11.49±1.59*# |  |
|  |  |  |  |  |  |  |
| Prospective cohort (n=112) | Low back VAS | 6.70±0.73 | 3.54±1.07* | 2.99±0.65**#* | 1.41±0.79*#& |  |
| Leg VAS | 6.34±0.8 | 3.25±1.05* | 2.56+0.57*# | 1.46±0.60*#& |  |
| ODI | 33.19±3.88 | - | 22.15±3.06*# | 11.42±2.59*#& |  |
| MIVH (mm) | 8.43±1.58 | 11.74±1.60* | - | 10.65±1.59*# |  |

Note: Pre-, preoperative; post-, postoperative; n, number of patients; * represents *P*<0.05, compared to the preoperative parameter; # represents *P*<0.05, compared to the post-operative 1 week; & represents *P*<0.05, compared to the post-operative 3 months; - represents data not available; MIVH: midpoint intervertebral heigh; VAS: visual analogue scale; ODI: oswestry disability index.
